# Supplementary material
Source: MDPI journal article supplement (https://www.mdpi.com/2073-4441/15/6/1037)
Supplement: s1 [file s1]

# Supplementary Materials

## Beneath the Aegean Sun: Investigating *Dunaliella* Strains' Diversity from Greek SaltWorks

Urania Lortou<sup>1,†</sup>, Manthos Panou<sup>1,†</sup>, Georgia Papapanagiotou<sup>1,2,†</sup>, Georgia Florokapi<sup>1</sup>, Christos Giannakopoulos<sup>1</sup>, Savvas Kavoukis<sup>3</sup>, Georgios Iakovou<sup>3</sup>, Giorgos Zalidis<sup>2</sup>, Konstantinos Triantafyllidis<sup>3</sup>, Spyros Gkelis<sup>1\*</sup>

<sup>1</sup> School of Biology, Aristotle University of Thessaloniki, GR-541 24 Thessaloniki, Greece

<sup>2</sup> School of Agriculture, Aristotle University of Thessaloniki, GR-541 24 Thessaloniki, Greece

<sup>3</sup> Department of Chemistry, Aristotle University of Thessaloniki, GR-541 24 Thessaloniki, Greece

\*Correspondence: sgkelis@bio.auth.gr

†The authors have equally contributed to this work.

**Supplementary Table S1:** NCBI accession numbers of the TAU-MAC *Dunaliella* strains for the molecular markers 18S rRNA gene, the 18S-28S rRNA internal transcribed spacer (ITS), and the ribulose-1,5-bisphosphate carboxylase/oxygenase large subunit (*rbcl*) gene.

| Strain                                     | 18S rRNA | ITS      | <i>rbcl</i> |
|--------------------------------------------|----------|----------|-------------|
| <i>Dunaliella parva</i> TAU-MAC 0120       | OQ418458 | OQ418473 | OQ446816    |
| <i>Dunaliella granulata</i> TAU-MAC 0220   | OQ418459 | OQ418474 | OQ446817    |
| <i>Dunaliella minuta</i> TAU-MAC 0320      | OQ418460 | OQ418475 | OQ446818    |
| <i>Dunaliella minuta</i> TAU-MAC 0420      | OQ418461 | OQ418476 | OQ446819    |
| <i>Dunaliella terricola</i> TAU-MAC 0520   | OQ418462 | OQ418477 | OQ446820    |
| <i>Dunaliella asymmetrica</i> TAU-MAC 0620 | OQ418463 | OQ418478 | OQ446821    |
| <i>Dunaliella bioculata</i> TAU-MAC 0720   | OQ418464 | OQ418479 | -*          |
| <i>Dunaliella asymmetrica</i> TAU-MAC 0820 | OQ418465 | OQ418480 | -*          |
| <i>Dunaliella viridis</i> TAU-MAC 0920     | OQ418466 | OQ418481 | OQ446822    |
| <i>Dunaliella viridis</i> TAU-MAC 1020     | OQ418467 | OQ418482 | -*          |
| <i>Dunaliella granulata</i> TAU-MAC 1120   | OQ418468 | OQ418483 | OQ446823    |
| <i>Dunaliella minutissima</i> TAU-MAC 1220 | OQ418469 | OQ418484 | OQ446824    |
| <i>Dunaliella polymorpha</i> TAU-MAC 1320  | OQ418470 | OQ418485 | OQ446825    |
| <i>Dunaliella granulata</i> TAU-MAC 1420   | OQ418471 | OQ418486 | OQ446826    |
| <i>Dunaliella polymorpha</i> TAU-MAC 1520  | OQ418472 | OQ418487 | OQ446827    |

\*: *rbcl* gene fragment was not amplified

**Supplementary Table S2:** List with the accepted *Dunaliella* species from Algaebase and their representation in GenBank concerning the phylogenetic markers 18S rRNA gene, the 18S-28S rRNA internal transcribed spacer (ITS), and the ribulose-1,5-bisphosphate carboxylase/oxygenase large subunit (*rbcl*) gene.

| Species                                  | NCBI | 18S | <i>rbcl</i> | ITS |
|------------------------------------------|------|-----|-------------|-----|
| <i>Dunaliella acidophila</i>             | X    | –   | X           | –   |
| <i>Dunaliella asymmetrica</i> *          | –    | –   | –           | –   |
| <i>Dunaliella atacamensis</i>            | –    | –   | –           | –   |
| <i>Dunaliella baas-beckingii</i>         | –    | –   | –           | –   |
| <i>Dunaliella bardawil</i>               | X    | X   | X           | X   |
| <i>Dunaliella bioculata</i>              | X    | –   | X           | –   |
| <i>Dunaliella carpatica</i>              | –    | –   | –           | –   |
| <i>Dunaliella cordata</i>                | –    | –   | –           | –   |
| <i>Dunaliella euchlora</i>               | –    | –   | –           | –   |
| <i>Dunaliella gracilis</i>               | –    | –   | –           | –   |
| <i>Dunaliella granulata</i> *            | –    | –   | –           | –   |
| <i>Dunaliella jacobae</i>                | –    | –   | –           | –   |
| <i>Dunaliella lateralis</i> <sup>†</sup> | X    | –   | –           | –   |
| <i>Dunaliella maritima</i> <sup>†</sup>  | X    | –   | –           | –   |
| <i>Dunaliella media</i>                  | –    | –   | –           | –   |
| <i>Dunaliella minuta</i> *               | X    | X   | X           | –   |
| <i>Dunaliella minutissima</i> *          | –    | –   | –           | –   |
| <i>Dunaliella obliqua</i>                | –    | –   | –           | –   |
| <i>Dunaliella parva</i> *                | X    | X   | X           | X   |
| <i>Dunaliella paupera</i>                | –    | –   | –           | –   |
| <i>Dunaliella peircei</i>                | X    | –   | X           | –   |
| <i>Dunaliella polymorpha</i> *           | X    | –   | X           | –   |
| <i>Dunaliella primolecta</i>             | X    | –   | X           | –   |
| <i>Dunaliella pseudosalina</i>           | X    | X   | X           | –   |

|                                                    |   |   |   |   |
|----------------------------------------------------|---|---|---|---|
| <i>Dunaliella quartolecta</i>                      | X | X | X | – |
| <i>Dunaliella ruineniana</i>                       | – | – | – | – |
| <i>Dunaliella salina</i> subsp. <i>sibirica</i>    | – | – | – | – |
| <i>Dunaliella salina</i>                           | X | X | X | X |
| <i>Dunaliella terricola</i> *                      | – | – | – | – |
| <i>Dunaliella tertiolecta</i>                      | X | – | X | – |
| <i>Dunaliella turcomanica</i>                      | – | – | – | – |
| <i>Dunaliella viridis</i> var. <i>palmelloides</i> | – | – | – | – |
| <i>Dunaliella viridis</i> f. <i>euchlora</i>       | – | – | – | – |
| <i>Dunaliella viridis</i> *                        | X | – | X | – |

\* : Species where TAU-MAC strains have been classified into, in the present study

† : Species with deposited small sequences in GenBank / non phylogenetic informative
